# Supplementary material for: Comparative analyses of fecal microbiota in Tibetan and Chinese Han living at low or high altitude by barcoded 454 pyrosequencing
Source: PubMed Central journal article supplement (PMC4595765; doi:10.1038/srep14682), 2015-10-07
Supplement: srep14682-s1.pdf [file srep14682-s1.pdf]

**Title:** Comparative analyses of fecal microbiota in Tibetan and Chinese Han living in low or high altitude by barcoded 454 pyrosequencing

**Authors:** Long Li<sup>1,2</sup>, Xin Zhao<sup>1,3,\*</sup>

**Address:** <sup>1</sup>College of Animal Science and Technology, Northwest A&F University, Yangling, Shaanxi, People's Republic of China

<sup>2</sup>College of Animal Science, Agricultural and Animal Husbandry College of Tibet University, Nyingchi, Tibet, People's Republic of China

<sup>3</sup>Department of Animal Science, McGill University, 21,111 Lakeshore, Ste. Anne de Bellevue, Quebec, Canada, H9X 3V9

**Table S1.** Pyrosequencing data and estimator index of experimental subjects

| Sample ID | Reads | OTUs | Chao | Coverage | Shannon |
|-----------|-------|------|------|----------|---------|
| HH1       | 5542  | 1441 | 3744 | 0.831108 | 6.01    |
| HH2       | 7594  | 1593 | 4314 | 0.858836 | 5.47    |
| HH3       | 5538  | 1438 | 3455 | 0.831347 | 5.89    |
| HH4       | 6797  | 1419 | 3570 | 0.863469 | 5.37    |
| HH5       | 6651  | 1691 | 4250 | 0.837167 | 6.14    |
| HH6       | 4663  | 837  | 2172 | 0.884195 | 4.64    |
| HH7       | 6745  | 1527 | 4270 | 0.84937  | 5.56    |
| HH8       | 5563  | 1318 | 3205 | 0.846486 | 5.63    |
| HH9       | 6202  | 1562 | 4011 | 0.835214 | 5.95    |
| HH10      | 6872  | 1600 | 3508 | 0.856665 | 5.98    |
| HH11      | 5707  | 1292 | 3558 | 0.852111 | 5.72    |
| HH12      | 6823  | 1676 | 4342 | 0.837608 | 5.73    |
| LH1       | 9487  | 1697 | 4525 | 0.87973  | 4.57    |
| LH2       | 6938  | 1717 | 4361 | 0.836552 | 5.92    |
| LH3       | 5838  | 1460 | 4180 | 0.832306 | 5.74    |
| LH4       | 8128  | 1677 | 4430 | 0.865157 | 5.57    |
| LH5       | 7241  | 1720 | 4288 | 0.841873 | 5.67    |
| LH6       | 6068  | 1578 | 4153 | 0.822512 | 5.7     |
| LH7       | 7175  | 1762 | 4506 | 0.838328 | 5.77    |
| LH8       | 5635  | 1465 | 4088 | 0.826974 | 5.95    |
| LH9       | 5983  | 1627 | 4499 | 0.815477 | 5.84    |
| LH10      | 8206  | 1250 | 2512 | 0.909944 | 4.86    |
| LH12      | 7032  | 1611 | 4207 | 0.84727  | 5.58    |
| T1        | 8066  | 1886 | 4829 | 0.846268 | 6.08    |
| T2        | 5279  | 1164 | 3002 | 0.850161 | 4.88    |
| T3        | 7436  | 1670 | 4332 | 0.852743 | 5.7     |
| T4        | 9617  | 1588 | 4166 | 0.892794 | 5.46    |
| T5        | 6867  | 1440 | 3286 | 0.865152 | 5.36    |
| T6        | 8680  | 1704 | 4640 | 0.866935 | 4.91    |
| T7        | 9153  | 1998 | 5458 | 0.852835 | 5.06    |
| T8        | 7460  | 1950 | 5434 | 0.822654 | 5.74    |
| T9        | 7117  | 1642 | 4487 | 0.844878 | 4.98    |
| T10       | 6173  | 1817 | 4680 | 0.803013 | 6.11    |
| T11       | 7236  | 1994 | 4766 | 0.819928 | 6.13    |
| T12       | 6825  | 1936 | 5174 | 0.810549 | 6.11    |

The number of reads, OTUs, richness estimator Chao, and diversity estimator Shannon were calculated at the 97% similarity level. LH = Chinese Han living in Shaanxi; HH = Chinese Han living in Tibet; T = Tibetan.

**Table S2.** The P-values of ethnic and altitude on microbiota composition with various distance matrixes

| Factors  | P-values         |                   |                   |                |             |           |
|----------|------------------|-------------------|-------------------|----------------|-------------|-----------|
|          | Weighted UniFrac | Uneighted UniFrac | Abundance_Jaccard | Binary_Jaccard | Bray_curtis | Hellinger |
| Ethnic   | 0.0089           | 0.0001            | 0.0001            | 0.0003         | 0.0011      | 0.0003    |
| Altitude | 0.0028           | 0.0091            | 0.0268            | 0.126          | 0.1328      | 0.708     |

**Table S3.** Intake frequencies of selected main foods (times per week)

| Food<br>Group <sup>1</sup> | Cereals  | Tubers   | Legumes | Meat                  | Dairy                 | Vegetables            |
|----------------------------|----------|----------|---------|-----------------------|-----------------------|-----------------------|
| LH (n=11)                  | 15.2±3.9 | 9.2±3.2  | 4.4±1.2 | 14.0±1.9 <sup>b</sup> | 6.3±4.3 <sup>b</sup>  | 14.8±7.3 <sup>a</sup> |
| HH (n=12)                  | 16.9±5.8 | 10.6±2.2 | 4.3±2.1 | 13.9±2.5 <sup>b</sup> | 7.8±5.1 <sup>b</sup>  | 13.1±6.5 <sup>a</sup> |
| T (n=12)                   | 15.3±5.4 | 9.4±5.3  | 3.3±1.4 | 16.8±3.0 <sup>a</sup> | 11.9±5.3 <sup>a</sup> | 9.2±3.1 <sup>b</sup>  |

<sup>1</sup>LH = Chinese Han living in Shaanxi; HH = Chinese Han living in Tibet; T = Tibetans.

<sup>a,b</sup> Values with different superscripts within the same column are significantly different ( $p < 0.05$ ).

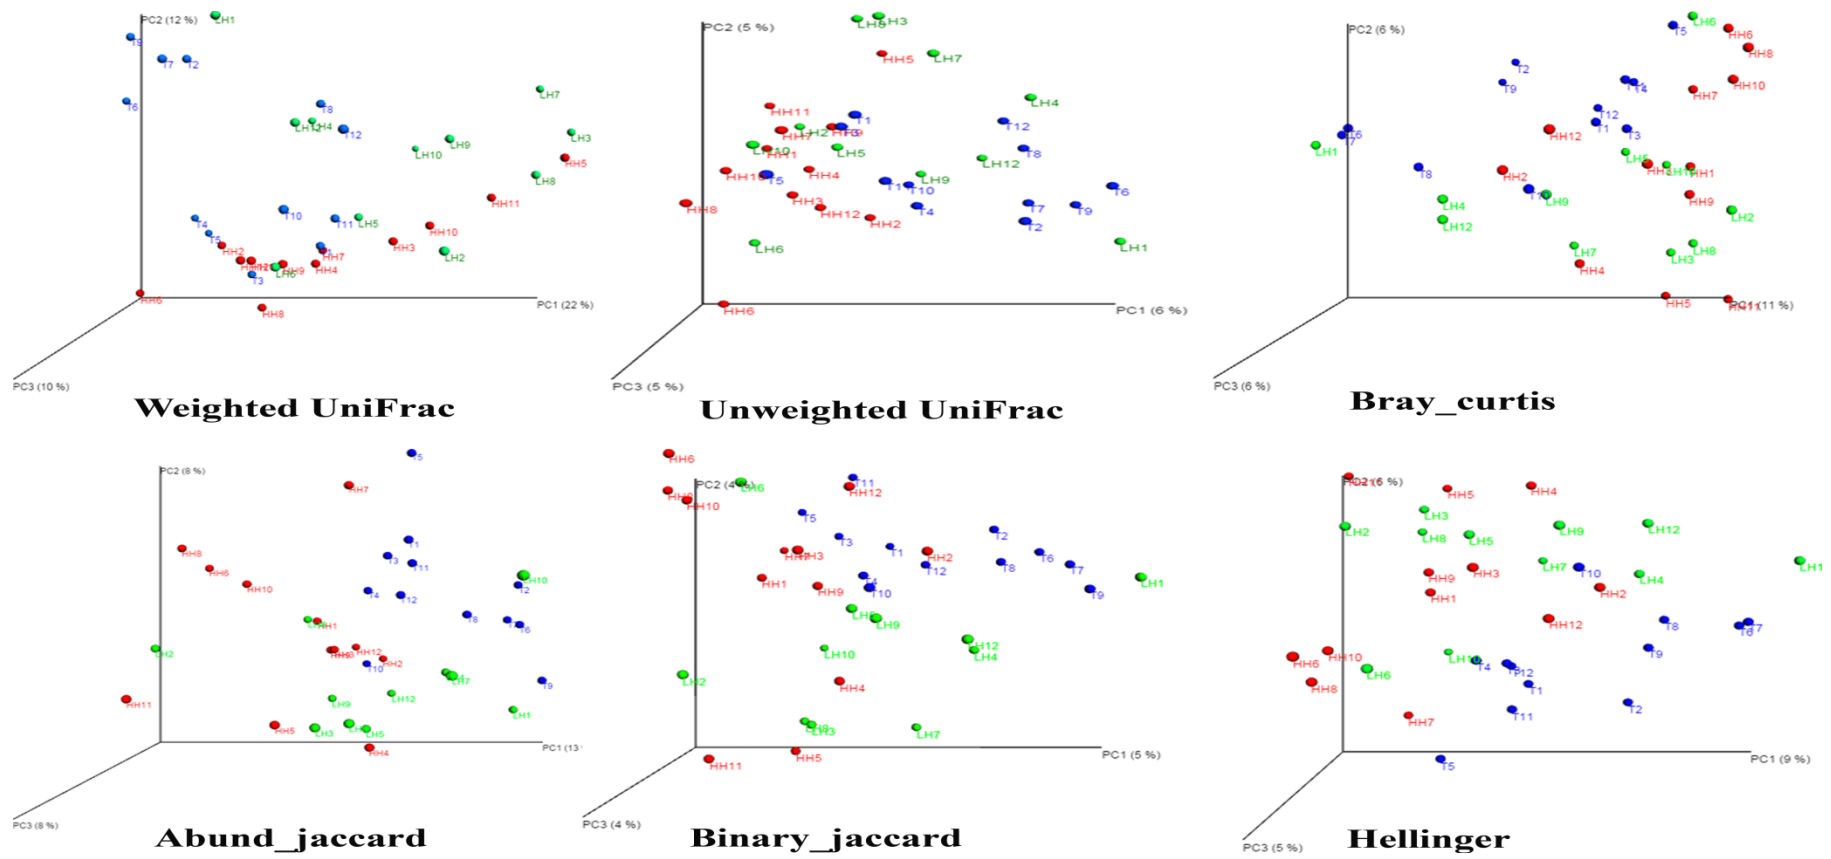

**Figure S1.** Beta-diversity analysis of all samples by unconstrained ordination methods with various distance matrixes. LH = Chinese Han living in Shaanxi (blue dots); HH = Chinese Han living in Tibet (green dots); T = Tibetans (blue dots).
